# Supplementary material for: The synergetic effect of a gold nanocluster–calcium phosphate composite: enhanced photoluminescence intensity and superior bioactivity
Source: Royal Society of Chemistry journal article supplement (doi:10.1039/d2cp04222c), 2022-01-01
Supplement: d2cp04222c1.pdf [file d2cp04222c1.pdf]

## Supporting Information

### The Synergetic Effect of Gold Nanoclusters-Calcium Phosphate Composite: Enhanced Photoluminescence Intensity and Superior Bioactivity

Yingying Jiang,<sup>a, b, †</sup> Xin Chen,<sup>b, †</sup> Jingzhi Yang,<sup>a</sup> Lo-Yueh Chang,<sup>c</sup> Ting-Shan Chan,<sup>c</sup> Han Liu,<sup>a</sup> Xiaohui Zhu,<sup>a</sup> Jiacan Su,<sup>a</sup> Hao Zhang,<sup>a\*</sup> Yunshan Fan,<sup>b\*</sup> and Lijia Liu<sup>d\*</sup>

<sup>a</sup>*Musculoskeletal Organoid Research Center, Institute of Translational Medicine, Shanghai University, Shanghai, 200444 China*

<sup>b</sup>*Department of Orthopedic, Spinal Pain Research Institute, Shanghai Tenth People's Hospital, Tongji University School of Medicine, Shanghai, 200072 China*

<sup>c</sup>*National Synchrotron Radiation Research Centre, 101 Hsin-Ann Road, Hsinchu, 30076, Taiwan*

<sup>d</sup>*Department of Chemistry, Western University, 1151 Richmond Street, London, Ontario, N6A5B7 Canada*

† These authors contributed equally.

\* Corresponding Authors Emails:

zhcarl6@126.com (H. Z.), yunshancs@163.com (Y. F.), lijia.liu@uwo.ca (L. L.)

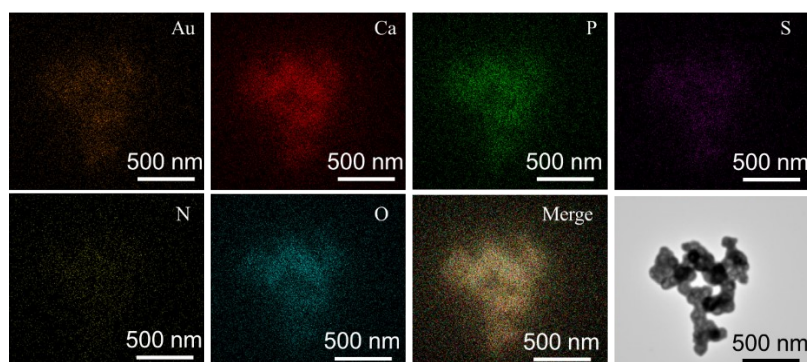

Figure S1. Elemental distribution of AuNCs@ACP acquired using EDX. The TEM image of the particles is also included for comparison.

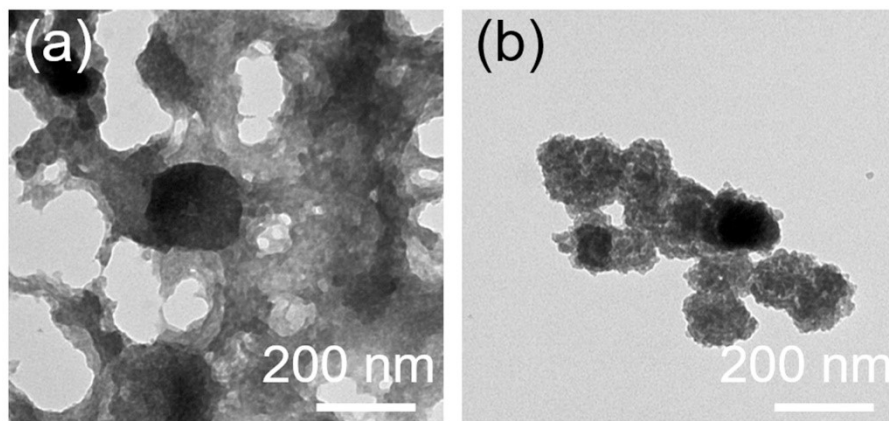

Figure S2. TEM micrographs of the AuNCs@ACP composite made with various volumes of 1.0 M CaCl<sub>2</sub>. (a) 100  $\mu$ L, (b) 400  $\mu$ L.

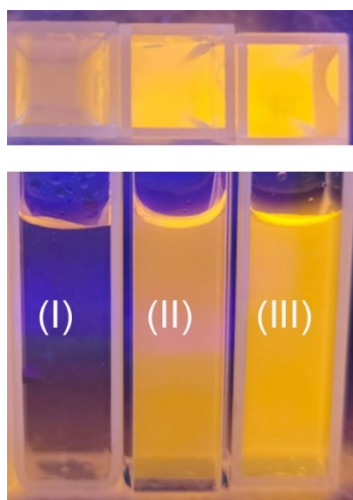

Figure S3. Optical photographs of AuNCs@ACP prepared with various volumes of 1.0 M CaCl<sub>2</sub>. (I) 100  $\mu$ L, (II) 200  $\mu$ L, (III) 400 $\mu$ L.

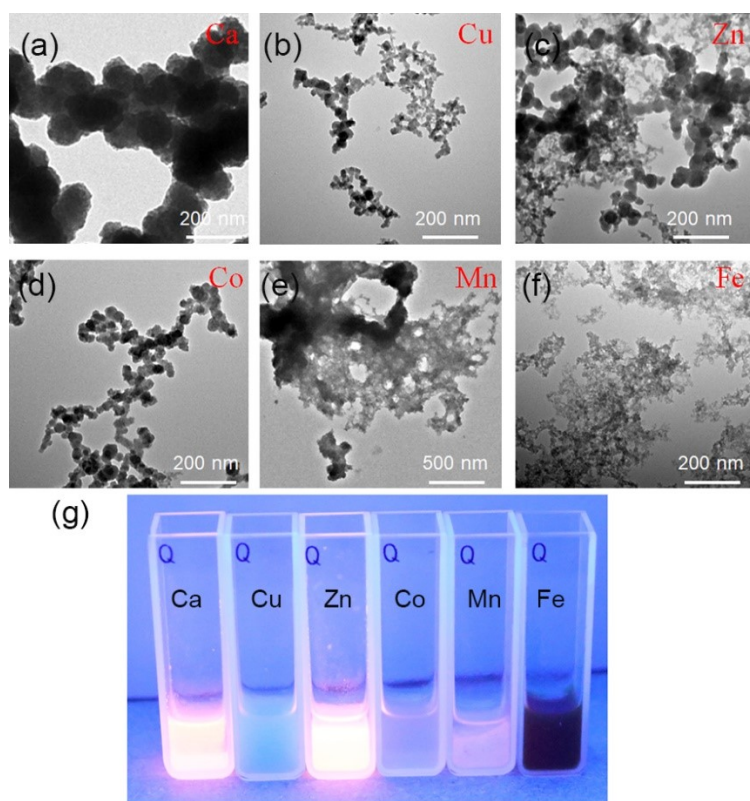

Figure S4. Biomimetic mineralization of AuNCs in DMEM in the presence of various divalent ions. (a)-(f) TEM images of the composites, (g) photograph of these composites taken under 365nm UV light.

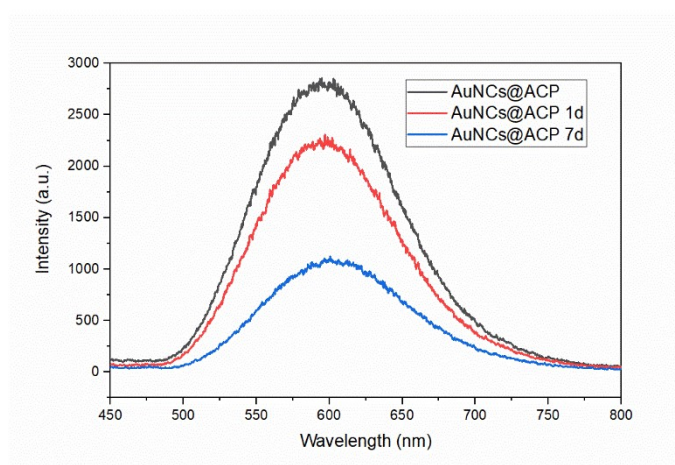

Figure S5. PL spectra of freshly prepared AuNCs@ACP and the one stored after 1 day and 7 days.

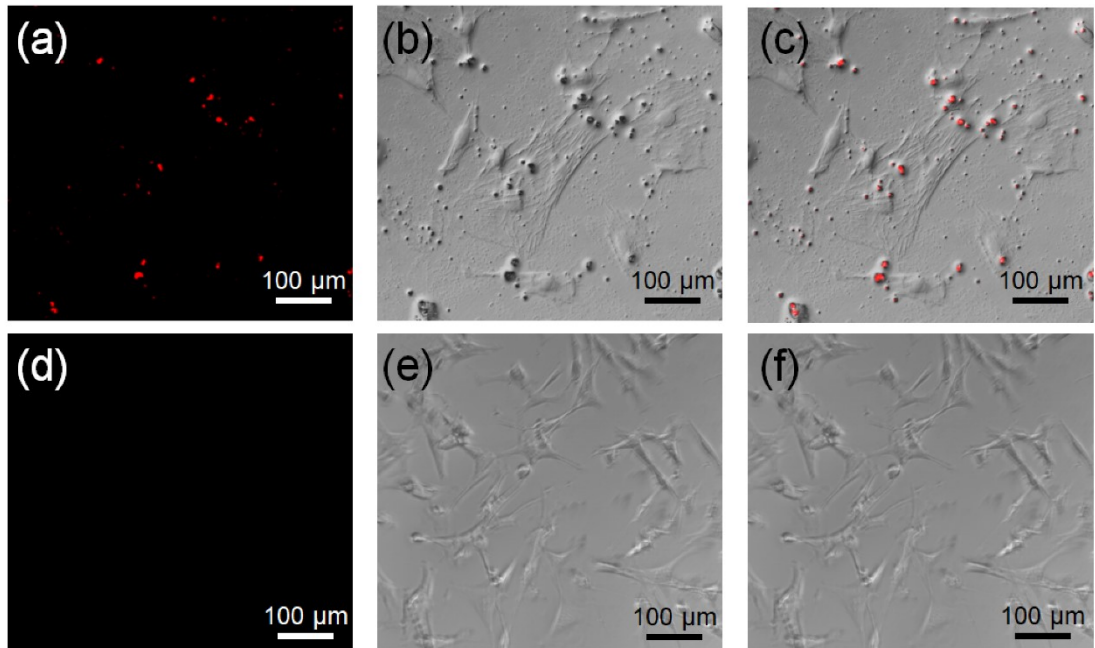

Figure S6. CLSM images of BMSCs co-cultured with (a – c) AuNCs@ACP for 1 h and (d – f) AuNCs alone for 5 h. (a, d) fluorescence, (b, e) optical, and (c, f) merged image.
